# Supplementary material for: Knowledge about Plant Coexistence during Vegetation Succession for Forest Management on the Loess Plateau, China
Source: MDPI journal article supplement (doi:10.3390/f13091456), 2022-09-10
Supplement: s1 [file s1]

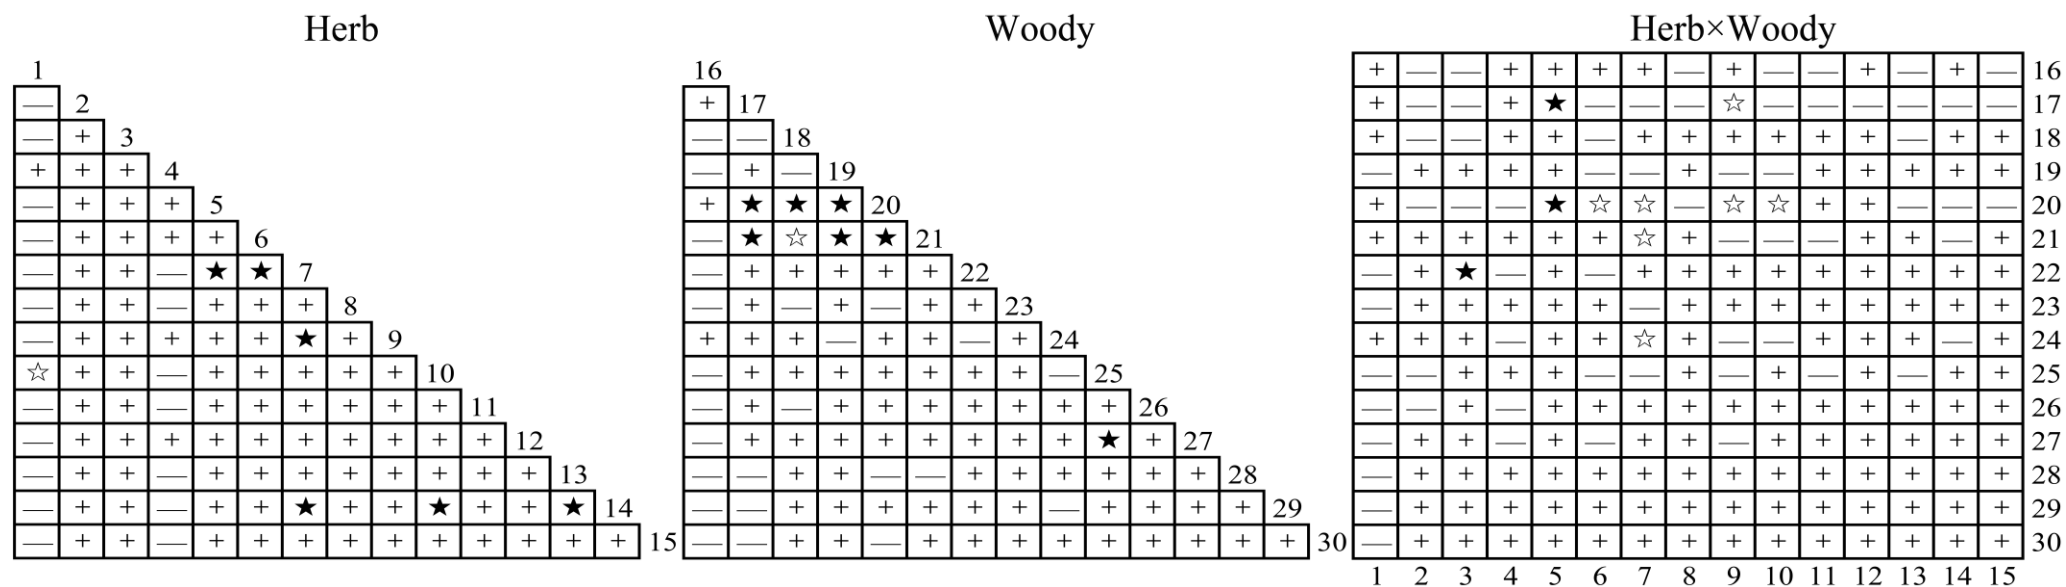

Figure S1. Half matrix graph of the interspecific association  $\chi^2$  test among the 30 plant species at the Ziwuling study area on the Chinese Loess Plateau. ★, significantly positive association; ☆, significantly negative association; +, not significantly positive association; —, not significantly negative association. The numbers represent the plants listed in article Table 1.
